# **Excitability changes in the motor cortex in preparation for self-paced and cue-guided movements: a transcranial magnetic stimulation study**

J. Ibáñez<sup>1</sup>, R. Hannah<sup>1,2</sup>, L. Rocchi<sup>1</sup>, J.C. Rothwell<sup>1</sup>

1. Department of Movement Disorders, Institute of Neurology, UCL, UK

2. Department of Psychology, University of California San Diego, USA

CORRESPONDENCE: Jaime Ibáñez, UCL Institute of Neurology, London, WC1N 3BG, UK,  
email: [j.ibanez@ucl.ac.uk](mailto:j.ibanez@ucl.ac.uk)

ABBREVIATED TITLE: Cortical excitability changes before cue-guided and self-paced movements

CONFLICT OF INTEREST: The authors declare no competing financial interests.

ACKNOWLEDGEMENTS: JI was supported in part by Grant No. #H2020-MSCA-IF-2015-700512 from the European Commission (JI). RH was supported by a Biotechnology and Biological Sciences Research Council (BBSRC) (Grant No. BB/N016793/1).

1 **SIGNIFICANCE:**

2 Brain responses to transcranial magnetic stimulation provide insight into how the brain  
3 prepares planned movements. However, most experiments involve temporally-controlled  
4 stimulus-driven actions. We provide evidence that cortical excitability evolves over the  
5 same time course in self-paced and reaction time movements. This is paralleled by  
6 previously unreported similarities in the way movement onset times are altered (speeded)  
7 when stimuli are delivered some hundreds of milliseconds before movements are to be  
8 started. This contrasts starkly with movements timed according to predictable  
9 countdowns. Here we see equivalent temporal evolution of pre-movement excitability,  
10 but the timing of these movements is unaffected by the external stimuli, thus suggesting  
11 a higher control of the time of action initiation.

12

13 **ABSTRACT:**

14 A simple of model of movement preparation, involving subthreshold accumulation of  
15 motor commands readily explains two features of a simple reaction time task. One is  
16 preparatory inhibition of corticospinal excitability, which is viewed as necessary to  
17 prevent premature release of movement. The other is intersensory facilitation in which  
18 receipt of a second stimulus at the same time as the imperative signal shortens the time  
19 taken to trigger a reduction in inhibition and increase in excitation. This allows  
20 preparatory activity to reach threshold more quickly and release action.

21 Here we question that interpretation by asking what happens in movements that are self-  
22 paced or timed to be coincident with an external event (predictive movements).  
23 Surprisingly we find that both types of movement show preparatory inhibition at  
24 approximately the same time prior to movement initiation as in a reaction time movement.

25 This suggests that rather than preventing premature release, premovement inhibition is an  
26 integral part of preparation to move, and may reflect preparatory neural population  
27 dynamics shared between actions initiated in different contexts. We also observed  
28 intersensory facilitation in self-paced movements when a sensory event preceded  
29 predicted movement onset by about 200-300ms. We suggest that this is consistent with  
30 the idea that the preparatory state requires a separate trigger event before movement is  
31 initiated. Intersensory facilitation was not seen in predictive movements, perhaps because  
32 they filter out external signals that could interfere with internal timing events.

33

## 34 **Introduction**

35 Simple reaction time (RT) movements are usually viewed as the stimulus-triggered  
36 release of prepared, “subthreshold”, movement commands (Tanji and Evarts, 1976; Prut  
37 and Fetz, 1999). But what happens if movements are made without reference to an  
38 external trigger? For example, self-paced (SP) movements, or movements that are made  
39 to coincide with an external event rather than being triggered by it (“predictive” task: PT).  
40 If a movement is self-paced or predictive, then are movement commands still stored in  
41 advance and released by an internal trigger? Or does movement occur immediately  
42 preparation is complete? Perhaps no preparation is needed at all.

43 The aim of the present experiments was to compare movement preparation in these three  
44 types of movement (RT, PT and SP). In particular, we tested whether 2 key characteristics  
45 of RT movements differed in the three tasks.

46 The first characteristic was preparatory inhibition. In RT tasks, corticospinal excitability  
47 is reduced around the expected time of the imperative stimulus (Hasbroucq et al., 1997).

48 This has been interpreted as preventing the premature release of the prepared

49 “subthreshold” motor plan (Touge et al., 1998; Duque et al., 2010, 2017). It is compatible  
50 with data from animal experiments showing that there are changes in the firing of  
51 neurones in motor cortex at a time when there is no overt EMG activity in the periphery  
52 (Omrani et al., 2017). If preparatory inhibition is necessary to prevent premature release  
53 of movement commands (Duque et al., 2010), then it may be reduced in PT movements  
54 where the time to move is known, and it should not be present at all in SP movements  
55 when there is intentionally no constraint on the time of execution.

56 The second characteristic of RT movements investigated here was inter-sensory  
57 facilitation, in which the presence of a second sensory stimulus at around the time of the  
58 imperative stimulus reduces reaction times and speeds release of the prepared movement  
59 (Nickerson, 1973; Pascual-Leone et al., 1992b). It has been postulated that the additional  
60 input shortens the time taken to identify the imperative stimulus (Pascual-Leone et al.,  
61 1992b). SP and PT movements may not require an external trigger since they could start  
62 immediately preparation was complete. If so they would not display inter-sensory  
63 facilitation.

64 Recent work on the relationship between movement preparation and execution leads to  
65 rather different predictions. Recordings of neural population activity in cortical motor  
66 areas of monkeys show that activity of neurons in the preparatory period may differ from  
67 that in the same neurons during execution (Churchland et al., 2010; Kaufman et al.,  
68 2014a). Preparatory activity is not a “subthreshold” version of that seen during execution  
69 and therefore, preparatory suppression would seem to be unnecessary (Kaufman et al.,  
70 2014b). Indeed, in human experiments, the degree of preparatory suppression was  
71 positively correlated to the RT, suggesting that, if anything, preparatory suppression was  
72 causally involved in preparation to move rather than in preventing its premature release

73 (Hannah et al., 2018). Thus, preparatory suppression might be seen in SP and PT  
74 movements as well as in RT tasks.

75 Recordings of neural activity also show that all types of movement are preceded by the  
76 same patterns of activity consisting of a preparation period during which discharge rates  
77 change without any overt EMG activity in the periphery (Lara et al., 2018). This is  
78 followed by a transition to an execution phase that appears to be caused by a separate and  
79 non-specific timing signal (Haith et al., 2016; Kaufman et al., 2016a). If this timing signal  
80 corresponds to an internal trigger for movement, then it may be susceptible to inter-  
81 sensory facilitation in SP and PT movements.

82 Our results show that both SP and PT movements display preparatory suppression of  
83 corticospinal excitability consistent with the idea that it is a necessary part of movement  
84 preparation rather than preventing premature release. SP movements also display inter-  
85 sensory facilitation-like effects, with onset times of speeded responses occurring earlier  
86 than predicted, suggesting that execution depends on some form of trigger. In contrast,  
87 PT movements do not display inter-sensory facilitation, which could indicate that there is  
88 active filtering of irrelevant sensory events that might distract from the internal trigger  
89 used in predictive timing.

## 90 **Materials and Methods**

### 91 *Participants*

92 In total, 28 right-handed, healthy participants (9 females,  $28 \pm 5$  years old, age range 19  
93 - 36 years) participated in this study. All of them reported no contraindications to TMS  
94 (Rossi et al., 2011) and had normal or corrected to normal visual acuity. The study was  
95 approved by the University College London Ethics Committee and warranted to be in

96 accordance with the Declaration of Helsinki. All participants signed a written informed  
97 consent prior to the experimental session.

### 98 **Recordings**

99 Participants sat in a comfortable chair with both forearms resting on a pillow placed on  
100 their lap and index fingers resting on a keyboard which registered movement times. A  
101 screen was placed approximately one meter in front of them. Participants wore ear  
102 defenders during the TMS experiments to reduce the influence of loud sounds generated  
103 by the discharges of the TMS coils.

104 EMG signals were obtained from the right first dorsal interosseous (FDI) muscle for  
105 experiment 1 and of both hands in experiment 2. EMG activity from the right abductor  
106 digiti minimi (ADM) muscle was also recorded in the two experiments. MEPs recorded  
107 from the right FDI were the main outcome of this study. The ADM was used as a control  
108 muscle for the MEPs: it was activated by the TMS stimuli but, unlike the right FDI, it  
109 was not directly involved in the movement, so it was only supposed to show a monotonic  
110 reduction of excitability up until the time at which muscles showed voluntary activation  
111 (Duque et al., 2010). Surface recording electrodes were placed on the muscle bellies, with  
112 references on the closest metacarpophalangeal joint. The ground electrode was placed on  
113 the right wrist. EMG signals were amplified, band-pass filtered between 20 Hz and 2000  
114 Hz (Digitimer D360, 2015 Digitimer Ltd, United Kingdom) and acquired at 5000 Hz  
115 sampling rate with a data acquisition board (CED-1401, Cambridge Electronic Design  
116 Ltd 2016) connected to a PC and controlled with the Signal and Spike<sup>2</sup> software (also by  
117 CED).

118 Once EMG sensors were set, the participants' TMS hotspot was located. This was done  
119 by finding the point over M1 giving the largest MEPs in the contralateral FDI for a given  
120 stimulus intensity. The TMS coil was always held at a 45° angle to the sagittal plane with

121 the handle pointing backwards. Once the hotspot was found, the resting motor threshold  
122 (RMT) and 1 mV intensity were determined. The RMT was estimated by adjusting the  
123 TMS output until 5 out of 10 MEPs could be obtained over 50  $\mu$ V. The 1 mV intensity  
124 was defined as that able to elicit MEPs of around 1 mV amplitude. The experimental  
125 paradigms were implemented using custom-made Matlab routines (Mathworks, MA,  
126 USA). Synchronization of TMS pulses with EMG and movement events was realised  
127 using Cogent 2000<sup>1</sup>'s utilities to control the parallel port of the PC running the  
128 experimental paradigms. Data analysis was carried out using custom-made Matlab  
129 functions and SPSS software (IBM, NY, USA).

### 130 **Experiment 1 – TMS recordings preceding RT and PT movements**

131 In this experiment, participants performed two types of movement paradigms: 1) a PT  
132 task in which movements were timed with an external countdown signal (Fig. 1-A); and  
133 2) a RT task in which movements were initiated following and imperative stimulus (Fig.  
134 1-B). During task execution, TMS pulses were delivered at predetermined time points  
135 relative to the average task- and subject-specific movement times to probe motor cortical  
136 excitability. The PT task consisted of a resting phase of 2 s followed by a delay period of  
137 1 s during which four circles moved from the extremes of a cross towards its centre with  
138 a velocity inversely proportional to the remaining distance to the centre of the cross  
139 (initial distance 4.5 cm). Participants were instructed to time their movements with the  
140 merging of the circles so that button presses with the FDI were performed as soon as the  
141 circles fully overlapped. After each movement, the trial ended by giving participants  
142 feedback about the button press times. This feedback was displayed for a random period  
143 of time between 1-3 s, and it consisted of the time at which the button press had been

---

<sup>1</sup> By Cogent 2000 team at the FIL and the ICN and Cogent Graphics developed by John Romaya at the LON at the Wellcome Department of Imaging Neuroscience

144 detected, expressed in ms, and a font colour code indicative of the performance: green  
145 text was used for button presses done between 50-100 ms relative to the time at which  
146 circles overlapped, thus encouraging participants to aim at pressing the button within this  
147 interval; yellow text was used for button presses in the intervals 0-50 ms and 100-150 ms;  
148 finally, red text was used in any other case. Additionally, participants were given “too  
149 early” and “too late” messages when button presses were performed during the delay  
150 period or more than 200 ms after its end. The RT task had the same states with matched  
151 durations as the PT task but, in this case, the movement of the circles during the delay  
152 period followed a random and uninformative path along the four arms of the cross (Fig.  
153 1). In this case participants were instructed to wait until the circles suddenly appeared in  
154 the centre of the cross, which was considered the “GO” cue. Participants were specifically  
155 asked to avoid any predictions of when the imperative cues were appearing. For that, they  
156 were told to specifically use the sudden overlapping of the circles in the centre of the  
157 screen to make a fast and reactive movement.

158 At the start of each task, participants practised the two paradigms until they showed  
159 consistent movement times. Thirty additional movements were then performed with each  
160 paradigm so that the subject- and task-specific average movement onset times (based on  
161 the FDI EMG activity) could be estimated. Then, the actual recording took place,  
162 consisting in two blocks per paradigm (interleaving the blocks of the two paradigms). In  
163 each block, six conditions were tested for 10 trials each, using a randomized order of  
164 conditions. These conditions differed from each other with regards to the timing of the  
165 TMS pulse: 1) no TMS delivered (control condition); 2) TMS at the beginning of the  
166 delay period (baseline condition); 3) TMS halfway through the delay period; 4) TMS 200  
167 ms before the average movement onset time; 5) TMS 60 ms before the average movement  
168 onset time; and 6) TMS 30 ms before the average movement onset time.



169 **Experiment 2 – TMS during the resting phases between SP movements**

170 The task involved participants sitting still and comfortably, with both index fingers  
171 resting on buttons on a keyboard. They were instructed to make ballistic bilateral button  
172 presses every 4-8 seconds, whilst avoiding pre-movement muscle activation and ensuring  
173 movements were made in a similar way along the whole experiment (Fig. 1-C).  
174 Movements of the left index finger (non-targeted by the TMS) allowed accurate estimates  
175 of the onset of voluntary movements (Schneider, 2004) without being affected by the  
176 TMS induced delays of voluntary actions in cases where the stimulus was given in close  
177 proximity with the intended movement onset time (Ziemann et al., 1997). Participants  
178 were instructed to perform their movements spontaneously and to avoid any form of  
179 internal countdown to decide when to initiate the movements. It was stressed to  
180 participants that they must not let the TMS pulses alter their decision to move. A resting  
181 period of time followed by a button press was considered a trial, and 12 blocks were  
182 performed by each participant with 65 trials making up a block. During blocks, EMG was  
183 monitored to ensure the hand was in a relaxed condition between movements.

184 A custom-made Matlab program was used to determine the timing of a TMS stimulus on  
185 a given trial based on the button press times registered in the previous 5 trials performed  
186 by each participant without TMS (this number of trials was empirically chosen to allow  
187 the code program to quickly adapt to changes in participants' behaviours). TMS pulse  
188 timing were distributed so that in 4% of the trials, stimuli were delivered early after the  
189 previous movement (3 s after the previous button press); 8% of the trials were non-TMS  
190 trials, which were then used to monitor inter-movement intervals in the absence of  
191 external stimuli along the experiment. Finally, in 82% of the trials, TMS pulse timings  
192 were defined based on the probability density function of inter-movement intervals  
193 considering the 5 most recent non-TMS trials. For that, a Gaussian fit was estimated and

194 the next TMS firing time was selected according to the left-hand side of this probability  
195 density function. TMS firing times were thus programmed to be delivered at a time  
196 interval relative to the previous movement such that it was always below the average  
197 inter-movement interval estimated. It was important to ensure that time intervals left by  
198 participants between button presses were not too long, as this would result in reduced  
199 chances of delivering TMS pulses at points in time close to the button presses. In the cases  
200 when participants waited for over 10 s between movements for 3-4 trials in a row,  
201 participants were given an indication by the experimenter to reduce the inter-movement  
202 time intervals.

### 203 **Analysis of results and statistics**

204 All the analyses were done using the onsets of the EMG as the reference points indicating  
205 the times of movement initiations. In order to obtain EMG references in each trial, the  
206 absolute value of the EMG recordings was estimated and then a moving average of 5 ms  
207 and a low pass filter ( $f_c < 5\text{Hz}$ ) were applied to obtain a smoothed envelope of the EMG  
208 signal. EMG recordings of all trials whilst the participant was at rest were analysed to  
209 obtain a subject-specific baseline level. A threshold set at five times the baseline value  
210 was used to determine EMG onset times. This level was also used to detect and remove  
211 trials with pre-TMS or pre-movement activation of all the muscles registered. All trials  
212 were then visually inspected and manually corrected to ensure that EMG-based  
213 movement onsets were estimated properly and that no building-up of EMG activity was  
214 apparent before the TMS pulses. Once trials were corrected, EMG onset times and peak  
215 to peak amplitudes of MEPs were estimated. MEP amplitudes were estimated from the  
216 acquired EMG signals without applying any additional filters. A logarithmic  
217 transformation of MEP amplitudes was performed before the statistical tests to ensure  
218 normality in the distributions of amplitudes.

219 In Experiment 1, MEP amplitudes and times of EMG onsets of all trials were labelled  
220 according to the type of paradigm (PT v RT) and to the time at which TMS was delivered.  
221 Movement onset times were referenced to the ones obtained with each participant in the  
222 control trials without TMS (subtracting the average movement onset times). A two-way  
223 repeated measures ANOVA (rmANOVA) with factors TIME and PARADIGM was  
224 performed to test for changes in movement onset times. A three-way rmANOVA (TIME  
225 x PARADIGM x MUSCLE) was performed to test for changes in MEPs. Post-hoc  
226 comparisons were done between the baseline and 200 ms before movement TMS  
227 conditions.

228 In Experiment 2, two types of trials were extracted per session: TMS trials in which a  
229 TMS stimulus was delivered before the movement, and non-TMS trials in which no TMS  
230 pulse was scheduled so they could be used as control trials to define the correct times of  
231 subsequent TMS pulses. To check if TMS pulses were inadvertently used by the  
232 participants as cues to start the movements in TMS trials, we compared inter-movement  
233 intervals in TMS and non-TMS trials using a paired t-test. Additionally, to analyse the  
234 effect of TMS pulses on the times at which participants decided to move, non-TMS trials  
235 were used to simulate the length of the TMS-movement intervals had participants not  
236 been biased by TMS stimuli. To do this, all non-TMS trials obtained from each session  
237 were used by a simulation algorithm (5000 iterations) that: *i*) randomly selected 5 trials  
238 in each iteration; *ii*) obtained a simulated TMS time for the “next” trial in the same way  
239 as in the actual experiment; *iii*) randomly selected a new trial of the same participant; *iv*)  
240 obtained the time interval between the movement onset time and the simulated TMS time  
241 and kept it if it was positive (*i.e.*, if the TMS was delivered before the movement).

242 Regarding the TMS recordings in experiment 2, since the times of the MEPs relative to  
243 the posterior movements could not be well controlled (due to the free nature of SP

244 movements), standard bootstrap statistics were applied to all participants' MEPs  
245 recordings in order to identify, in an unbiased way, intervals of interest, *i.e.*, intervals that  
246 contained significant increases or decreases in MEP amplitudes. To do this, the following  
247 steps were repeated for 100 iterations: 1) 200 TMS-trials per participant were chosen at  
248 random. Since the number of TMS trials obtained with each participant was different, this  
249 step balanced the influence of each participant's data when combining data from all  
250 participants. 2) MEPs selected from each participant were referenced to MEPs in the  
251 interval [-1500 : -500] ms relative to the onset of movements, *i.e.* MEPs were subtracted  
252 the mean and divided by the standard deviation of the MEPs in the defined interval. 3)  
253 MEP values from all participants were merged. 4) A sliding window of 40 ms in steps of  
254 20 ms was applied from -1 s to the movement onset. For each window, 40 MEPs were  
255 picked at random with replacement (standard bootstrapping procedure) and used to  
256 calculate a mean. This was repeated 1000 times, thus generating 1000 means for every  
257 window. These values were arranged in ascending order and the 25<sup>th</sup> and 975<sup>th</sup> values  
258 were taken as confidence intervals. This whole process was repeated 100 times (using  
259 different sets of 200 trials per participant each time), and an average of all estimated  
260 confidence intervals was taken to produce the definitive confidence intervals of MEP  
261 changes across the time in preparation for the movements. Subsequently, a two-way  
262 rmANOVA was performed in SPSS with factors TIME and MUSCLE to test for changes  
263 in MEP amplitudes. Here, the TIME factor included the baseline period [-1500:-500] ms,  
264 and the periods of time in which significant decreases or increases of the right FDI MEPs  
265 were observed (*i.e.*, time intervals when both confident interval lines obtained from the  
266 previous bootstrap analysis were either positive or negative).

267 Overall, all results are reported as group mean  $\pm$  standard error of the mean (SEM).  
268 Bonferroni *post-hoc* corrections are applied in the cases of multiple comparisons. *P*

269 values  $< 0.05$  are considered to be significant. The Greenhouse–Geisser procedure was  
270 applied where necessary to correct for violations of sphericity in rmANOVAs.

## 271 **Results**

### 272 **Experiment 1**

273 The average movement onset times (based on EMG) obtained in the baseline trials  
274 without TMS were  $-35 \pm 6$  ms and  $200 \pm 9$  ms for the PT and RT paradigms, respectively.

275 The average time intervals between the estimated EMG onset times and the button press  
276 events were  $93 \pm 3$  ms (PT) and  $91 \pm 3$  ms (RT). Fig. 2 shows the observed average  
277 movement times in the two paradigms for different TMS firing times. There appear to be  
278 two main effects. First, if the TMS pulses are given 30 or 60ms prior to average movement  
279 times, then reactions are delayed. Previous work as ascribed this to the effect to the silent  
280 period following the TMS-evoked MEP. The second effect is that reaction times are  
281 reduced in the RT task when TMS pulses are given 200ms prior to average movement  
282 times at around the time of the imperative stimulus. Previous work refers to this as a form  
283 of intersensory facilitation caused by the auditory click and scalp stimulation from the  
284 TMS pulse.

285 These conclusions are borne out in the statistical analysis. rmANOVA showed a  
286 significant main effect of TIME ( $F_{[4,6]} = 18.154$ ;  $P < 0.001$ ), reflecting delayed responses  
287 when TMS pulses were delivered in proximity to the average movement times (*i.e.*, higher  
288 movement times were found when TMS pulses where delivered 60 ms and 30 ms before  
289 the average movement times). In addition, there was a significant interaction of  
290 PARADIGM x TIME ( $F_{[4,6]} = 11.943$ ;  $P = 0.003$ ). Post-hoc comparison between  
291 paradigms for trials in which TMS pulses were delivered 200 ms before the average  
292 movement time revealed a significant reduction of the movement times in the RT

293 movements relative to the PT (mean difference of  $-29.8 \pm 8.8$  ms;  $P = 0.008$ ). No  
294 significant difference was found between paradigms for baseline TMS trials (mean  
295 difference  $-3.8 \pm 5.0$  ms;  $P = 0.473$ ).

296 Resting motor threshold and 1mV levels were  $53 \pm 3$  % and  $63 \pm 3$  % of the maximum  
297 stimulator output, respectively. Fig. 3 shows average MEP results. rmANOVA showed a  
298 main effect of factors MUSCLE ( $F_{[1,9]} = 8.327$ ;  $P = 0.018$ ; difference between FDI and  
299 ADM:  $0.7 \pm 0.2$  log( $\mu$ V)) and TIME ( $F_{[4,6]} = 5.731$ ;  $P = 0.010$ ). The post-hoc comparison  
300 between MEPs obtained from TMS pulses delivered either at the baseline point or 200  
301 ms before the average movement times revealed a significant reduction of MEPs at the  
302 latter point (mean difference:  $-0.5 \pm 0.1$  log( $\mu$ V);  $P = 0.009$ ). There was a significant  
303 interaction of MUSCLE  $\times$  TIME ( $F_{[4,6]} = 11.943$ ;  $P < 0.001$ ), due to the diverging  
304 directions of MEP changes in the FDI and ADM at the time of movement initiation  
305 (Duque et al., 2010). Post-hoc comparisons between baseline trials and trials with TMS  
306 delivered 200 ms before the average movement time revealed significant reductions of  
307 MEPs both in the FDI (mean difference  $-0.5 \pm 0.2$  log( $\mu$ V);  $P = 0.018$ ) and in the task-  
308 irrelevant ADM (mean difference  $-0.4 \pm 0.1$  log( $\mu$ V);  $P = 0.040$ ). No significant  
309 differences were found in the reductions (TMS 200 ms before movements) of the FDI  
310 MEPs between the RT and PT paradigms ( $P = 0.590$ ). MEPs obtained with TMS pulses  
311 delivered 200 ms before average movement times relative to baseline MEPs showed an  
312 average reduction of 31 % and 35 % for PT and RT tasks, respectively.

## 313 **Experiment 2**

314 The average inter-movement intervals in TMS and non-TMS trials was  $4.94 \pm 0.16$  s and  
315  $4.99 \pm 0.18$  s. A paired t-test on the inter-movement intervals of TMS and non-TMS trials  
316 revealed no significant difference between both conditions ( $P = 0.415$ ). Fig. 4 shows a

317 comparison between real and simulated distributions (across all participants) of time  
318 intervals between TMS firing times and consecutive movement onset times. The  
319 experimental design was such that distribution of TMS times relative to the time of  
320 movement should reflect the left-hand side of a normal distribution (before movement),  
321 with the peak occurring close to the onset of movement. Instead, the obtained  
322 distributions show a trough around 300 ms followed by a peak at ~100 ms before the  
323 onset of the muscle activation. This suggests that, in trials in which TMS is delivered less  
324 than 300 ms before participants were about to move, movements were speeded, thus  
325 modifying the normal distribution expected to result from the design of the paradigm. The  
326 paired sample t-test returned significant differences between the simulated and the real  
327 distributions 300 ms before the onsets of the movements and in the interval [-150 ms : -  
328 50 ms] also relative to the movement ( $p < 0.001$  in both intervals). We refer to this  
329 speeding up as a form of intersensory facilitation.

330 Resting motor threshold and 1 mV levels were  $56 \pm 3 \%$  and  $66 \pm 4 \%$  of the maximum  
331 stimulator output, respectively. Fig. 5 shows the summary of the MEP results obtained  
332 both using bootstrap statistics on the grouped (z-scored) data and from the posterior  
333 comparison between the intervals of interest. The bootstrap analysis returned a significant  
334 ( $P < 0.01$ ) interval of MEP reduction that applied both to the FDI and the ADM muscles.  
335 For the FDI, this period with reduced MEPs peaked at -120 ms (relative to the estimated  
336 muscle activation onsets) and it was followed by an (also significant) increase of  
337 excitability towards the time of initiation of the movement. According to these results,  
338 the period of reduced excitability was defined to be at the time interval [-160 ms : -100  
339 ms] relative to the movement (*i.e.*, the two consecutive 40 ms windows showing the  
340 strongest MEP reduction effects in the bootstrap analysis). Due to the lack of a dense  
341 enough population of MEPs at the late phase before movements were initiated, we used

342 the MEPs located within the final 80 ms interval before starting the movements as  
343 representative of the movement initiation phase (Pascual-Leone et al., 1992b; Chen and  
344 Hallett, 1999; Chen et al., 1999). rmANOVA showed main effects of MUSCLE ( $F_{[1,17]} =$   
345  $26.246$ ;  $P < 0.001$ ; mean difference between FDI and ADM:  $1.0 \pm 0.2 \log(\mu V)$ ) and TIME  
346 ( $F_{[2,16]} = 9.046$ ;  $P = 0.01$ ). The post-hoc comparison of MEPs within the baseline and  
347 excitability reduction intervals revealed a significant reduction of MEPs at the latter time  
348 point (mean difference:  $0.3 \pm 0.1 \log(\mu V)$ ;  $P = 0.006$ ). There was also a significant  
349 interaction of MUSCLE x TIME ( $F_{[2,16]} = 13.041$ ;  $P < 0.001$ ). Post-hoc comparisons  
350 between MEPs for baseline and reduced excitability conditions and for each muscle  
351 separately revealed a significant effect in both cases ( $P = 0.019$  for FDI;  $P = 0.020$  for  
352 ADM).

## 353 **Discussion**

354 In the present experiments we probed the temporal evolution of M1 excitability in  
355 paradigms with different constraints on movement initiation times. The results showed  
356 that reduced excitability can be observed prior to a voluntary movement whether it is self-  
357 paced, predictive or reactive. In addition, we found that TMS had distinct biasing effects  
358 on movement times across the different paradigms. While the initiation of a predictive  
359 movement was unaffected by TMS, RT and SP movements were speeded in a way  
360 resembling intersensory facilitation effects commonly reported in RT tasks (Nickerson,  
361 1973). Overall, the results support the notion that preparatory cortical excitability changes  
362 in M1 do not have a direct functional role in preventing premature movement releases  
363 and they raise the question about the possible similarities of the mechanisms involved in  
364 triggering planned voluntary movements in the presence or absence of specific external  
365 cues.



366 *Different movement preparation paradigms exhibit similar patterns of preparatory M1*  
367 *excitability*

368 A comparison of the results obtained in the three paradigms tested here suggests a  
369 common temporal evolution of corticospinal excitability before movements, regardless  
370 of the nature of the trigger that initiates them. It has previously been hypothesized that  
371 M1 excitability reduction before movements reflects proactive control of motor cortical  
372 outputs preventing premature responses (Bestmann and Duque, 2015; Duque et al., 2017).  
373 However, this does not explain why we see the same premovement suppression prior to  
374 SP movements, in which there is explicitly no temporal constraint on initiation time.  
375 Strictly speaking, suppression is also unnecessary in the PT movements since if  
376 preparation was initiated at the correct time it would automatically evolve to reach  
377 threshold and initiate a movement to coincide with the external event. Only if suppression  
378 was used to reduce the variability of onset times would it serve a function.

379 Instead, our results appear a better fit for the alternative hypothesis that smaller responses  
380 reflect the dynamics of neural populations evolving towards more stable states from  
381 which to initiate movement (Churchland et al., 2010; Shenoy et al., 2013; Kaufman et al.,  
382 2014b, 2016b; Hannah et al., 2018). Recent studies in primates show that the time spent  
383 in this preparatory state can be compressed or extended depending on task demands (Lara  
384 et al., 2018). This observation might explain why we observed a peak in MEP suppression  
385 in SP movements which, relative to RT and PT movements, was shifted towards time  
386 points closer to the EMG onsets. It may also be relevant to the longer RTs in paradigms  
387 with unpredictable imperative stimuli (Alink et al., 2010). These could be explained by  
388 the need to make a transition through reduced excitability states after the imperative  
389 stimulus. Indeed, previous work has shown that, in reaction time tasks without prior  
390 warning cues, MEPs remain unchanged before the imperative signal but show a marked

391 suppression right after the onset of the imperative cue (Duque et al., 2014). Altogether,  
392 our results support the notion that MEP changes in preparation for movements can largely  
393 be explained as being a result of action- and state-specific M1 evolutions towards  
394 movement rather than being a reflection of proactive control mechanisms over M1.

395 The size and spatio-temporal patterns of the observed excitability reduction in preparation  
396 for movements, which was comparable across conditions, matched the results of previous  
397 TMS studies based on RT paradigms. On average, MEP amplitudes decreased by 30%,  
398 in line with changes reported before (Duque et al., 2014; Quoilin et al., 2016). The FDI  
399 muscle (task-relevant) presented deeper decreases of MEP amplitudes than the control  
400 ADM muscle across conditions, in agreement with previous research suggesting a  
401 somatotopic gradient in excitability changes related to the location, certainty and  
402 specificity of forthcoming actions (Greenhouse et al., 2015).

#### 403 *Intersensory facilitation depends on the predictability of the imperative stimulus*

404 Different TMS biasing effects found in PT and RT movement times indicate that these  
405 paradigms differ with respect to how motor commands are withheld and/or released.  
406 Movement initiation in RT movements is contingent upon external cues and the link  
407 between sensory processing and release of motor programs is presumed to be direct  
408 (Pascual-Leone et al., 1992b). Speeded responses in RT movements induced by TMS  
409 have been interpreted as intersensory facilitation (Nickerson, 1973; Terao et al., 1997),  
410 and have been suggested to be due to a shortening of the time for identification of external  
411 stimuli as the go-signal (Pascual-Leone et al., 1992b). In eye movement paradigms with  
412 predictable onsets of imperative cues, previous studies have proposed that inner  
413 mechanisms aimed at anticipating the timing of the environmental cues need to be  
414 deployed and used to trigger motor commands (Janssen and Shadlen, 2005; Badler and  
415 Heinen, 2006). Based on this, in the PT task tested here the lack of speeded responses can

416 be attributed to the usage of an alternative mechanism to trigger movements, which is  
417 internally driven, once the timing of external stimuli is learned. In this case, external  
418 signals during the delay period of PT movements may be either downregulated (Alink et  
419 al., 2010) or simply disregarded (Rohenkohl et al., 2012).

#### 420 *Biasing effects of TMS in SP movements*

421 Analysing brain responses to external stimuli before SP movements with a degree of  
422 temporal precision is technically challenging and only few studies have attempted it.  
423 Wasaka and colleagues used a SP paradigm to show that sensory suppression processes  
424 in these actions partially resembled those seen in preparation for RT movements  
425 (Shimazu et al., 1999; Wasaka et al., 2003). Castellote and colleagues showed that  
426 StartReact responses during the resting periods before self-initiated movements are  
427 closely similar to StartReac responses in RT paradigms (Valls-Sole et al., 1999; Castellote  
428 et al., 2013). Interestingly, Castellote's experiment showed a biasing effect of startling  
429 stimuli on movement times that tightly resembles that obtained here (Fig. 3), *i.e.*, if  
430 delivered with a certain anticipation (~300 ms) before the forthcoming movements, the  
431 startling stimuli speed-up the release of the required movements. In that work, the features  
432 of the responses matched those obtained in StartReact paradigms using RT tasks, which  
433 allowed authors to suggest that the mechanisms engaged in the preparation for SP and  
434 cue-driven actions could share common elements (Castellote et al., 2013). In our case,  
435 the intensity of the applied stimuli (1 mV TMS and participants using ear defenders ,  
436 which lessen the likelihood of startle response) suggests that the observed effects are  
437 closer to intersensory facilitation (Pascual-Leone et al., 1992b, 1992a). Precisely  
438 quantifying how much movements are sped-up would help verify this idea (Valls-Sole et  
439 al., 2008), but doing so is challenging because of the lack of a more precise knowledge  
440 about when movements would be performed in the absence of external stimuli. Based on

441 the fact that stimuli used in the RT and SP paradigms were equal and responses to TMS  
442 comparable, it is conceivable that effects observed in both cases reflect the use of a similar  
443 neural strategy to trigger actions that is not shared by PT movements.

#### 444 *Technical considerations and future work*

445 Studying corticospinal changes before SP movements with TMS has inherent limitations.  
446 We were able to obtain movement times and MEPs in our SP paradigm despite the  
447 apparent difficulties in accurately probing excitability at specific, well-defined times  
448 relative to movement onset. However, unlike with cue-guided movements, the  
449 estimations of TMS times (relative to the movements) in the SP paradigm were done  
450 based on the times of the subsequent movements of the non-stimulated hand, which also  
451 presents intersensory facilitation effects (Hannah et al., 2018), is not affected by cortical  
452 silent period-related delaying effects (Ziemann et al., 1997), but may still have been  
453 biased by the TMS pulse in a different way than the stimulated side. Therefore, precise  
454 estimations of the excitability reduction peak time in this case are not definitive.

455 Previous studies testing the possible contribution of spinal mechanisms to the decrease  
456 seen in MEP amplitudes in preparation for movements in reaction time tasks have led to  
457 contradictory results (Duque et al., 2010; Lebon et al., 2016; Hannah et al., 2018). The  
458 techniques used here to probe corticospinal excitability do not allow measuring whether  
459 spinal inhibitory processes are taking place in preparation for movements performed in  
460 the three paradigms tested. Knowing if and how spinal inhibition applies to cue-driven  
461 and SP movements could help further proving the hypothesis that observed preparatory  
462 changes are not driven by proactive control mechanisms. Such analysis should be  
463 addressed in future work.

#### 464 *Conclusions*

465 Taken together, results from the three compared paradigms suggest that TMS recordings  
466 of excitability changes in preparation for planned movements share a common temporal  
467 profile, likely reflecting aspects of neural population-level changes to generate the desired  
468 actions. Results also suggest possible shared neural mechanisms involved in triggering  
469 reaction time and self-paced movements that are different from those in actions timed  
470 with fully predictable cues.

## 471 **Acknowledgments**

472 We gratefully acknowledge the technical assistance of Paul Hammond. We also thank  
473 Arisa Reka for assistance in collection of data in Experiment 2.

## 474 **References**

- 475 Alink A, Schwiedrzik CM, Kohler A, Singer W, Muckli L (2010) Stimulus Predictability Reduces  
476 Responses in Primary Visual Cortex. *J Neurosci* 30:2960–2966.
- 477 Badler JB, Heinen SJ (2006) Anticipatory Movement Timing Using Prediction and External Cues. *J*  
478 *Neurosci* 26:4519–4525.
- 479 Bestmann S, Duque J (2015) Transcranial Magnetic Stimulation: Decomposing the Processes Underlying  
480 Action Preparation. *Neurosci*:1–14.
- 481 Castellote JM, Van Den Berg MEL, Valls-Sole J (2013) The startreact effect on self-initiated movements.  
482 *Biomed Res Int* 2013.
- 483 Chen R, Corwell B, Hallett M (1999) Modulation of motor cortex excitability by median nerve and digit  
484 stimulation. *Exp Brain Res* 129:77–86.
- 485 Chen R, Hallett M (1999) The time course of changes in motor cortex excitability associated with  
486 voluntary movement. *Can J Neurol Sci* 26:163–169.
- 487 Churchland MM, Cunningham JP, Kaufman MT, Ryu SI, Shenoy K V. (2010) Cortical Preparatory  
488 Activity: Representation of Movement or First Cog in a Dynamical Machine? *Neuron* 68:387–400.
- 489 Duque J, Greenhouse I, Labruna L, Ivry RB (2017) Physiological Markers of Motor Inhibition during  
490 Human Behavior. *Trends Neurosci* 40:219–236.
- 491 Duque J, Labruna L, Cazares C, Ivry RB (2014) Dissociating the influence of response selection and task  
492 anticipation on corticospinal suppression during response preparation. *Neuropsychologia* 65:287–  
493 296.
- 494 Duque J, Lew D, Mazzocchio R, Olivier E, Ivry RB, Louvain D, Brussels B-, Clinica N (2010) Evidence  
495 for Two Concurrent Inhibitory Mechanisms during Response Preparation. *J Neurosci* 30:3793–  
496 3802.
- 497 Greenhouse I, Sias A, Labruna L, Ivry RB (2015) Nonspecific Inhibition of the Motor System during  
498 Response Preparation. *J Neurosci* 35:10675–10684.
- 499 Haith AM, Pakpoor J, Krakauer JW (2016) Independence of Movement Preparation and Movement  
500 Initiation. *J Neurosci* 36:3007–3015.
- 501 Hannah R, Cavanagh XSE, Tremblay S, Simeoni S, Rothwell XJC (2018) Selective Suppression of Local  
502 Interneuron Circuits in Human Motor Cortex Contributes to Movement Preparation. 38:1264–1276.

- 503 Hasbroucq T, Kaneko H, Akamatsu M, Possamar C-A (1997) Preparatory inhibition of cortico-spinal  
504 excitability: a transcranial magnetic stimulation study in man. *Cogn Brain Res* 5:185–192.
- 505 Janssen P, Shadlen MN (2005) A representation of the hazard rate of elapsed time in macaque area LIP.  
506 *Nat Neurosci* 8:234–241.
- 507 Kaufman MT, Churchland MM, Ryu SI, Shenoy K V. (2014a) Cortical activity in the null space:  
508 permitting preparation without movement. *Nat Neurosci* 17:440–448.
- 509 Kaufman MT, Churchland MM, Ryu SI, Shenoy K V. (2014b) Cortical activity in the null space:  
510 Permitting preparation without movement. *Nat Neurosci* 17:440–448.
- 511 Kaufman MT, Seely JS, Sussillo D, Ryu SI, Shenoy K V., Churchland MM (2016a) The Largest  
512 Response Component in the Motor Cortex Reflects Movement Timing but Not Movement Type.  
513 *eNeuro* 3.
- 514 Kaufman MT, Seely JS, Sussillo D, Ryu SI, Shenoy K V., Churchland MM (2016b) The Largest  
515 Response Component in the Motor Cortex Reflects Movement Timing but Not Movement Type.  
516 *eNeuro* 3.
- 517 Lara AH, Elsayed GF, Zimnik AJ, Cunningham J, Churchland MM (2018) Conservation of preparatory  
518 neural events regardless of how movement is initiated. *Elife*:7:e31826.
- 519 Lebon F, Greenhouse I, Labruna L, Vanderschelden B, Papaxanthis C, Ivry RB (2016) Influence of Delay  
520 Period Duration on Inhibitory Processes for Response Preparation. *Cereb Cortex* 26:2461–2470.
- 521 Nickerson RS (1973) Intersensory facilitation of reaction time: Energy summation or preparation  
522 enhancement? *Psychol Rev* 80:489–509.
- 523 Omrani M, Kaufman MT, Hatsopoulos NG, Cheney PD (2017) Perspectives on classical controversies  
524 about the motor cortex. *J Neurophysiol*:jn.00795.2016.
- 525 Pascual-Leone A, Brasil-neto J, Valls-Sole J, Cohen LG, Hallett M (1992a) Simple reaction time to focal  
526 transcranial magnetic stimulation. *Brain*, 115, 109-122 :109–122.
- 527 Pascual-Leone A, Valls-Sole J, Wassermann EM, Brasil-neto J, Cohen LG, Hallett M (1992b) Effects of  
528 Focal Transcranial Magnetic Stimulation on Simple Reaction Time To Acoustic , Visual and  
529 Somatosensory stimuli. *Brain* 115:1045–1059.
- 530 Prut Y, Fetz EE (1999) Primate spinal interneurons show pre-movement. *Nature* 401:590–594.
- 531 Quoilin C, Lambert J, Jacob B, Klein PA, Duque J (2016) Comparison of motor inhibition in variants of  
532 the instructed-delay choice reaction time task. *PLoS One* 11:1–16.
- 533 Rohenkohl G, Cravo AM, Wyart V, Nobre AC (2012) Temporal Expectation Improves the Quality of  
534 Sensory Information. *J Neurosci* 32:8424–8428.
- 535 Rossi S, Hallett M, Rossini P, Pascual-Leone A (2011) Screening questionnaire before TMS: An update.  
536 *Clin Neurophysiol* 122:1686.
- 537 Schneider C (2004) Timing of cortical excitability changes during the reaction time of movements  
538 superimposed on tonic motor activity. *J Appl Physiol* 97:2220–2227.
- 539 Shenoy K V., Sahani M, Churchland MM (2013) Cortical Control of Arm Movements: A Dynamical  
540 Systems Perspective. *Annu Rev Neurosci* 36:337–359.
- 541 Shimazu H, Kaji R, Murase N, Kohara N, Ikeda A, Shibasaki H, Kimura J, Rothwell JC (1999) Pre-  
542 movement gating of short-latency somatosensory evoked potentials. *Neuroreport* 10:2457–2460.
- 543 Tanji J, Evarts E V (1976) Anticipatory activity of motor cortex neurons in relation to direction of an  
544 intended movement. *J Neurophysiol* 39:1062–1068.
- 545 Terao Y, Ugawa Y, Suzuki M, Sakai K, Hanajima R, Gamba-Shimizu K, Kanazawa I (1997) Shortening  
546 of simple reaction time by peripheral electrical and submotor-threshold magnetic cortical  
547 stimulation. *Exp Brain Res* 115:541–545.
- 548 Touge T, Taylor JL, Rothwell JC (1998) Reduced excitability of the cortico-spinal system during the  
549 warning period of a reaction time task. *Electroencephalogr Clin Neurophysiol* 109:489–495.
- 550 Valls-Sole J, Kumru H, Kofler M (2008) Interaction between startle and voluntary reactions in humans.  
551 *Exp Brain Res* 187:497–507.
- 552 Valls-Sole J, Rothwell JC, Goulart F, Cossu G, Muñoz E (1999) Patterned ballistic movements triggered

- 553 by a startle in healthy humans. *J Physiol* 516:931–938.
- 554 Wasaka T, Hoshiyama M, Nakata H, Nishihira Y, Kakigi R (2003) Gating of somatosensory evoked  
555 magnetic fields during the preparatory period of self-initiated finger movement. *Neuroimage*  
556 20:1830–1838.
- 557 Ziemann U, Tergau F, Netz J, Hömberg V (1997) Delay in simple reaction time after focal transcranial  
558 magnetic stimulation of the human brain occurs at the final motor output stage. *Brain Res* 744:32–  
559 40.
- 560

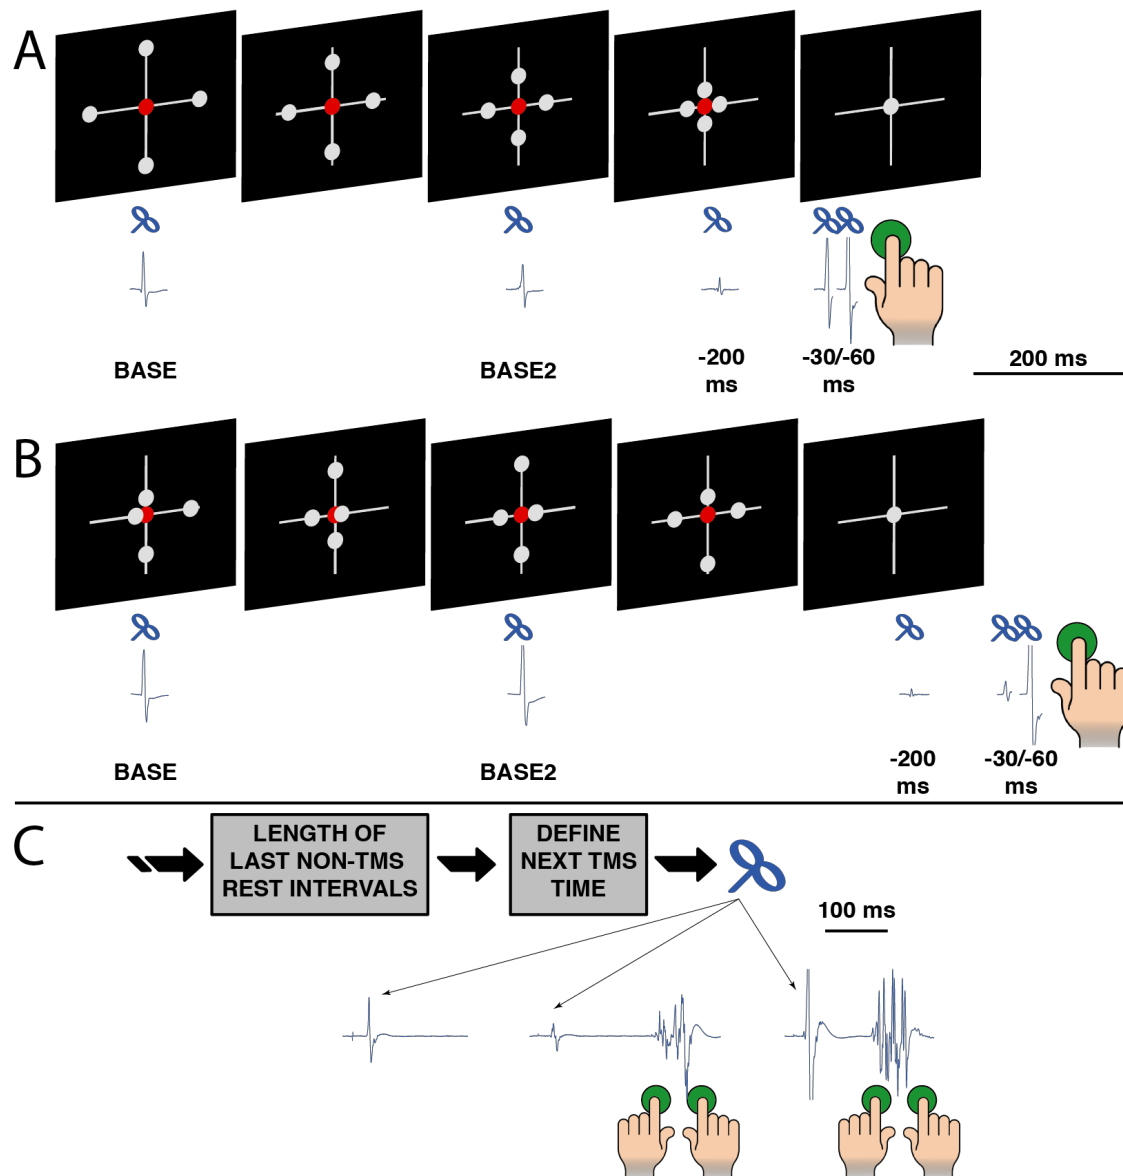

**Figure 1.** Movement initiation tasks and TMS recordings. (A) In PT movements - experiment 1- participants had to press a button with their index finger after the end of a 1-s countdown (the time it took the 4 white circles to reach the centre of the cross). (B) In RT movements -experiment 1- participants had to perform the same movement as in the PT task, but here they were specifically instructed to perform movements in response to seeing the 4 white circles suddenly appearing on the centre of the cross. During the 1-s delay period in this case, circles moved randomly along the arms of the cross. Both in PT and RT movements, single-pulse TMS was delivered when the four circles appeared



on the screen at the beginning of the delay period (BASELINE), half way through the delay period and 200/60/30 ms before the average movement times in each subject and for each task. (C) In experiment 2, participants performed SP movements consisting in simultaneously pressing two keyboard buttons with the index fingers of their two hands. An algorithm was run in parallel to characterize the times at which movements were performed in the non-TMS trials. This information was in turn used to distribute TMS pulses in subsequent TMS trials with different time intervals between the stimuli and the movements.

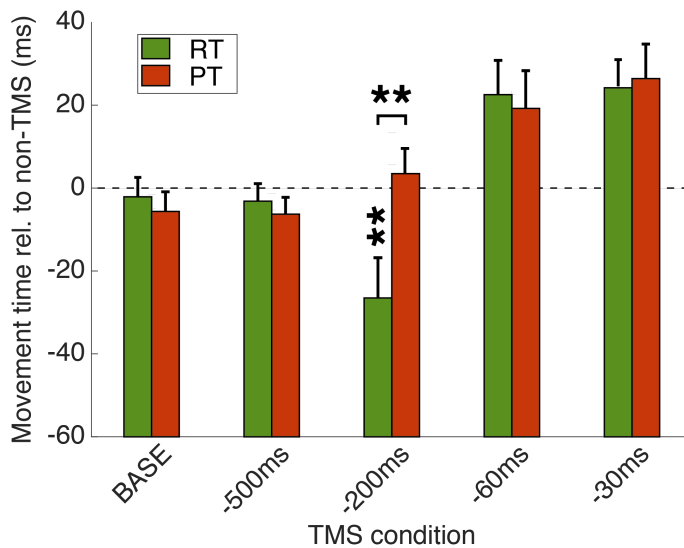

**Figure 2.** Means and SEs of the movement times (relative to non-TMS trials) for the RT (green) and PT (red) tested in Experiment 1. (\*\* indicates  $P < 0.01$ )

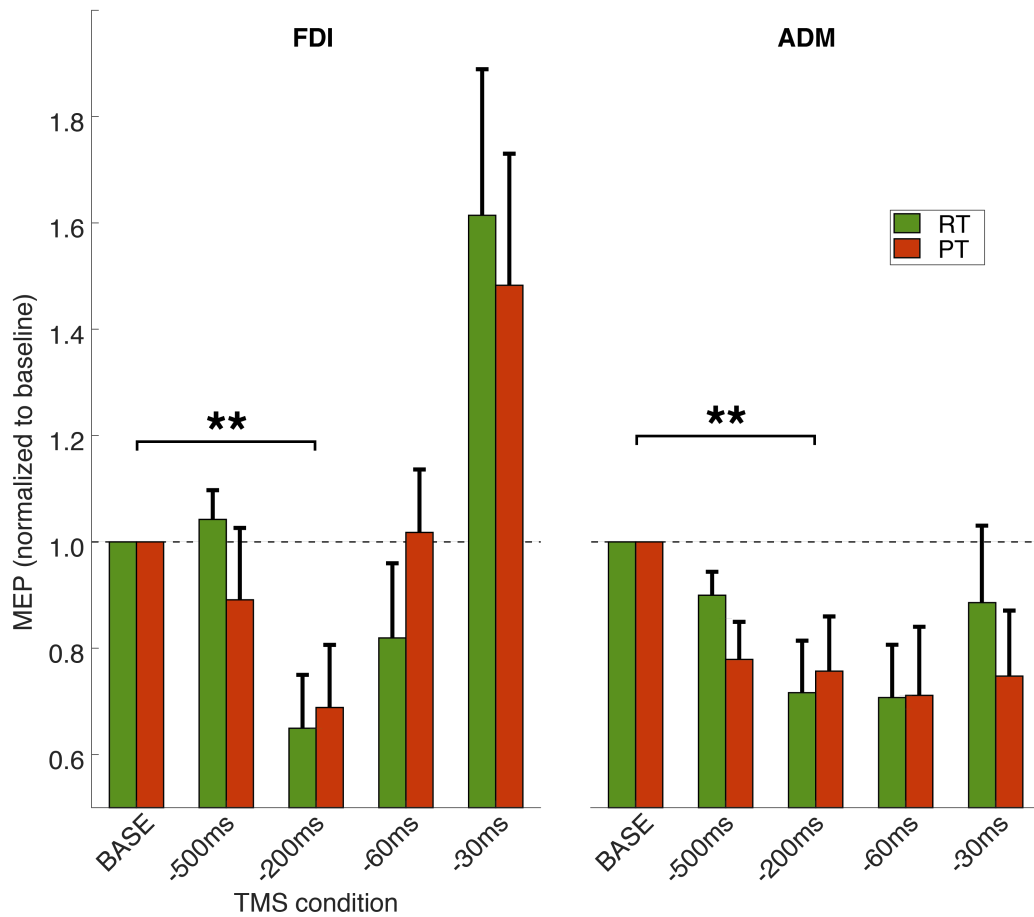

**Figure 3.** Normalized means and SEs of the FDI (left panel) and ADM (right panel) MEP amplitudes in RT (green) and PT (red) movements tested in Experiment 1. The found significant difference in MEPs between baseline and -200 ms TMS time conditions is indicated as well. (\*\* indicates  $P < 0.01$ )

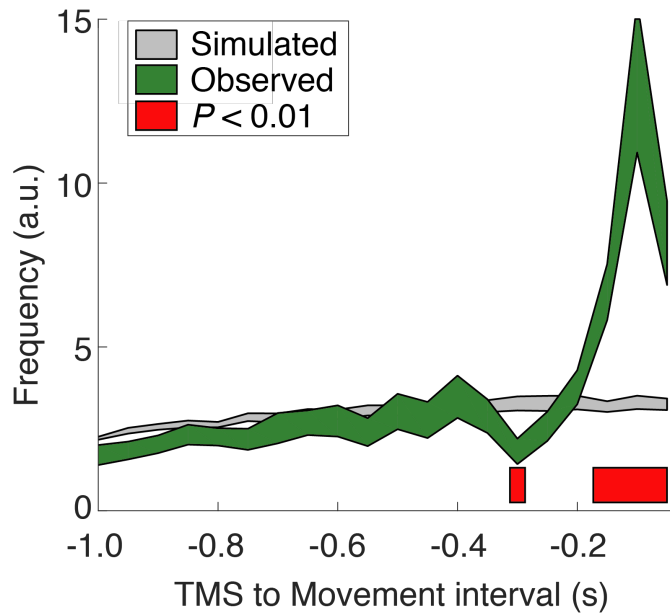

**Figure 4.** Upper and lower confidence limits (black lines) of the observed intervals between the TMS trigger times and the subsequent movement onset times in the SP paradigm (green). The simulated frequencies based on the non-TMS trials are represented in grey. The horizontal red bars represent time points in which a significant ( $P < 0.01$ ) difference between the two distributions is observed.

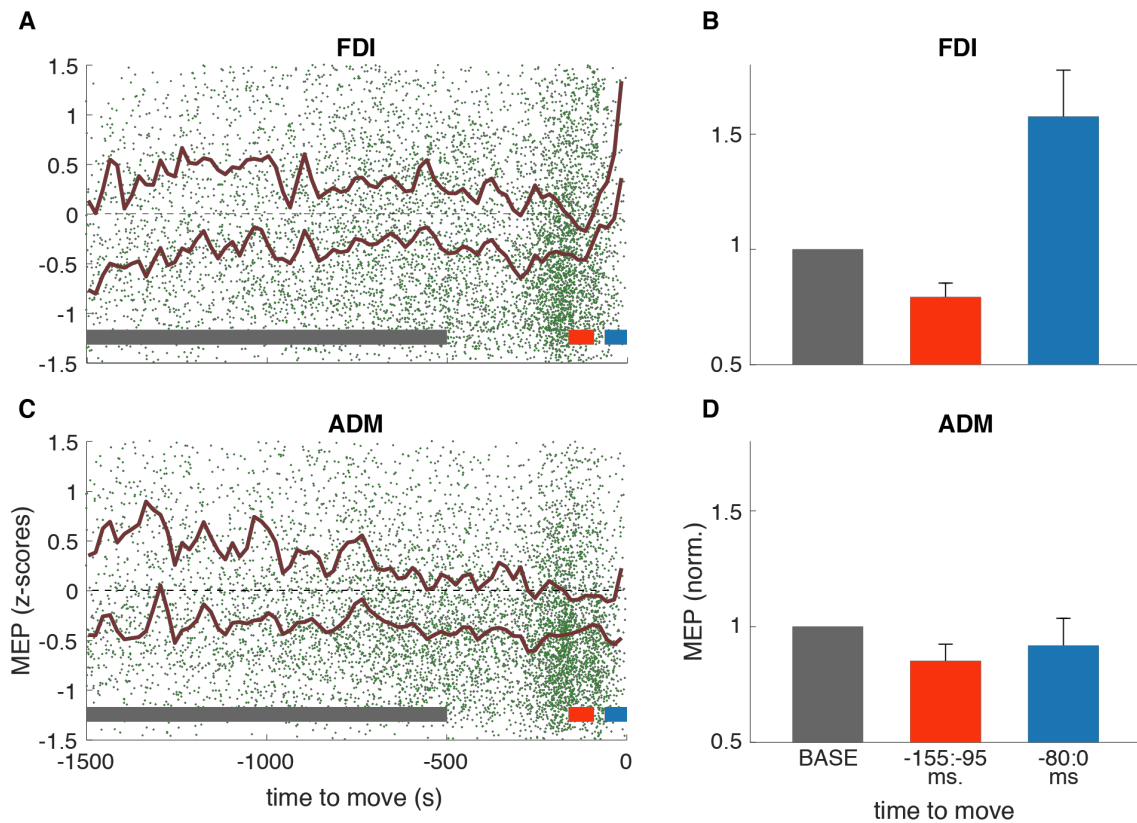

**Figure 5.** Changes in the FDI (A) and ADM (C) MEPs across time before movements in the SP paradigm. Grey dots show normalized MEP amplitudes (all subjects and trials). Red traces represent the upper and lower confident limits obtained using a bootstrap analysis with all data points ( $p < 0.001$ ). Bars at the bottom identify three intervals of interest used to extract MEPs for a subsequent group level rmANOVA. These are aimed to contain MEPs observed at baseline (grey), and during the periods of reduced excitability –black- and movement initiation phase (white). Normalized group means and SEs of FDI (B) and ADM (D) MEP amplitudes in the three selected intervals of interest.
